# Supplementary material
Source: Research Square preprint supplement (doi:10.21203/rs.3.rs-10086312/v1)
Supplement: Supplementary file 1 [file 77fca01caad4e3bc0dd3d13a.docx]

**Table 1:** Comparison of the data obtained from Debye-Scherrer's relation and W-H plot

| **Parameters** | **Debye-Scherrer's relation** | **W-H plot** |
| --- | --- | --- |
| Crystallite Size (D) | 29.6 (nm) | 45.26 (nm) |
| Microstrain (ε) | 4.7601 × 10-3 | 3.97 × 10-3 |
| Dislocation density(δ) | 11.41×1014/m2 | 4.8816×1014/m2 |
